# Supplementary material for: Soil and plant δ 15 N have a different response to experimental warming: A global meta-analysis
Source: Copernicus journal article supplement (doi:10.5194/soil-2021-40), 2021-06-04
Supplement: Supplementary file [file soil-2021-40-AC1-supplement.pdf]

## Response to CC1

If you take a look at the syntheses we have done, soil  $\delta^{15}\text{N}$  also appears to reflect the degree of decomposition of the organic matter.  $\delta^{15}\text{N}$  increases with processing. Warmer sites have soil N that is elevated in  $^{15}\text{N}$ , but has lower C:N. Once you control for C:N, there is little pattern in  $^{15}\text{N}$  across temperature gradients. similar interpretations could be applied here. You need to take a look at the syntheses and reviews we have done on how to interpret plant and soil  $^{15}\text{N}$ . there are important data here, but interpretation is important too.

Answer: Thank you very much for your efforts on our paper submitted to the “Soil” (Manuscript ID soil-2021-40). We have checked the manuscript and revised it according to the comments carefully.

In the Introduction section of the revised paper, we have stated that the larger the  $\delta^{15}\text{N}$  value, the higher degree of openness of N cycling. In addition, soil  $\delta^{15}\text{N}$  also appears to reflect the degree of decomposition of the organic matter, showing that  $\delta^{15}\text{N}$  increases with processing (Craine et al., 2015) (P4L58-60).

In the Discussion section, we have indicated that warmer sites have soil N that is elevated in  $^{15}\text{N}$ , but has lower C:N. Once C:N is controlled, there is little pattern in  $^{15}\text{N}$  across temperature gradients. In other words, the relationship between soil  $\delta^{15}\text{N}$  and climate is indirect, and mediated through climate effects on soil properties (e.g., the concentrations of organic carbon and clay) (Craine et al., 2015) (P10L207-211).

Finally, the relationships between the  $d$  values and environmental variables for plant  $\delta^{15}\text{N}$  were weaker than those for soil  $\delta^{15}\text{N}$  (Fig. 3). The possible reason is that several other factors (e.g., plant N concentrations and species richness) might co-regulate plant  $\delta^{15}\text{N}$  (Wu et al., 2019). This is consistent with the study of Craine et al. (2009), who found different inflection points in soil and plant  $\delta^{15}\text{N}$  relationships with MAT. In addition, plants are generally depleted in  $^{15}\text{N}$  relative to soils (P11L222-224).
