# Supplementary material for: Soil and plant δ 15 N have a different response to experimental warming: A global meta-analysis
Source: Copernicus journal article supplement (doi:10.5194/soil-2021-40), 2021-06-04
Supplement: Supplementary file [file soil-2021-40-AC2-supplement.pdf]

## Response to RC1

1. In this paper, few literatures (only 20 papers) were selected for meta-analysis. Fortunately, there are 79 and 76 paired observations for soil and plant  $\delta^{15}\text{N}$ , and I believe that these samples are enough for meta-analysis. However, the manuscript lacks of important information on soil, such as organic matter content.

Answer: Thank you very much for your efforts on our paper submitted to the “Soil” (Manuscript ID soil-2021-40). We have checked the manuscript and revised it according to the comments carefully.

In the revised paper, we have provided the soil information, including organic matter content, soil type, and soil pH (Table 1). In addition, we also re-conducted the meta-analysis to investigate the influences of soil texture, warming period and increase in temperature on the warming effects on soil and plant  $\delta^{15}\text{N}$  (Fig. 2). However, we did not consider the effect of soil organic matter content since only four literatures provided the organic matter content values.

2. The Introduction section still needs to be improved to clarify the key scientific issues. Such as, one of purpose of this study is to identify the main factors influencing the warming effect on the soil and plant  $\delta^{15}\text{N}$ . In fact, since a relatively large number of investigators from around the world were involved in the 20 studies that were selected, there is no indication that all these studies used similar protocols, and coordinated their experimental conditions. For example, we know that soil water content has an impact on soil and plant  $\delta^{15}\text{N}$ , and also impacts the analysis results. The authors should check what is the cause of the differences between soil and plant  $\delta^{15}\text{N}$ ?

Answer: In the revised manuscript, we have clarified that the objectives of this study were to: (i) detect the effect of experimental warming on the soil and plant  $\delta^{15}\text{N}$  based on a global meta-analysis of 20 studies; and (ii) identify the main factors influencing the warming effect on the soil and plant  $\delta^{15}\text{N}$ . Specifically, we hypothesized that soil  $\delta^{15}\text{N}$  is a better indicator of ecosystem N cycling than plant

$\delta^{15}\text{N}$  (P5L81-82).

Our criteria were as follows: at least one of the target variables was contained, including soils (different fractions, e.g., sand, silt, clay, aggregate and bulk soil) and plants (leaves, shoots, roots and litters)  $\delta^{15}\text{N}$ ; studies with climate gradients (space-time substitution) were excluded and only field warming experimental studies were included; only data from control and warming treatments were applied for multifactor experiments; means, standard deviations (SD) (or standard errors (SE)) and sample sizes were directly provided or could be calculated from the studies; if one article contained soil or plant  $\delta^{15}\text{N}$  in multiple years, only the latest results were applied since the observations should be independent in the meta-analysis (Hedges et al., 1999) (P5L90-99).

I agree with your comment that soil water content has an impact on soil and plant  $\delta^{15}\text{N}$ , and also impacts the analysis results. However, in the revised manuscript, we did not consider the effect of soil water content on the warming effects on soil and plant  $\delta^{15}\text{N}$ . This is due to the fact that soil water content has strong temporal and spatial variability, so it is difficult to control soil moisture in warming experiment. Nevertheless, in the revised paper, we re-conducted the meta-analysis to investigate the influences of soil texture, warming period and increase in temperature on the warming effects on soil and plant  $\delta^{15}\text{N}$  (Fig. 2).

3. The M & M section is a little rough and please reorganize this section to make it more clearly. Please provide detailed soil information which appeared in this section.

Answer: In the revised paper, we have provided detailed soil information, including organic matter content, soil type, and soil pH (Table 1). In addition, we also reorganized this section to make it more clearly.

4. The Discussion section, which is the most important part, is relatively weak because the contents and explanations are not well organized and are still not convincing. Less descriptive of results and more mechanism discussion are

encouraged in this section. More references should be added to the discussion section.

Answer: In the revised manuscript, we have added more references in the discussion section. In addition, we also re-conducted the meta-analysis to investigate the influences of soil texture, warming period and increase in temperature on the warming effects on soil and plant  $\delta^{15}\text{N}$ . From Fig. 2gh, the finer the soil texture, the more significant the positive effect of warming on soil and plant  $\delta^{15}\text{N}$ . The possible reason is that the finer the soil texture, the stronger the adsorption of various ions on the soil and the smaller the leaching loss of the soil, resulting in the greater the residual amount of  $^{15}\text{N}$  in the soil (Webster et al., 1986). In addition, the longer warming period and the greater increase in temperature resulted in the more negative effect of warming on soil  $\delta^{15}\text{N}$  (Fig. 2ik). Chang et al. (2017) deduced that N fixation was greater under warming and consequently resulted in a lower soil  $\delta^{15}\text{N}$  (P10L189-196).

Figure 2:

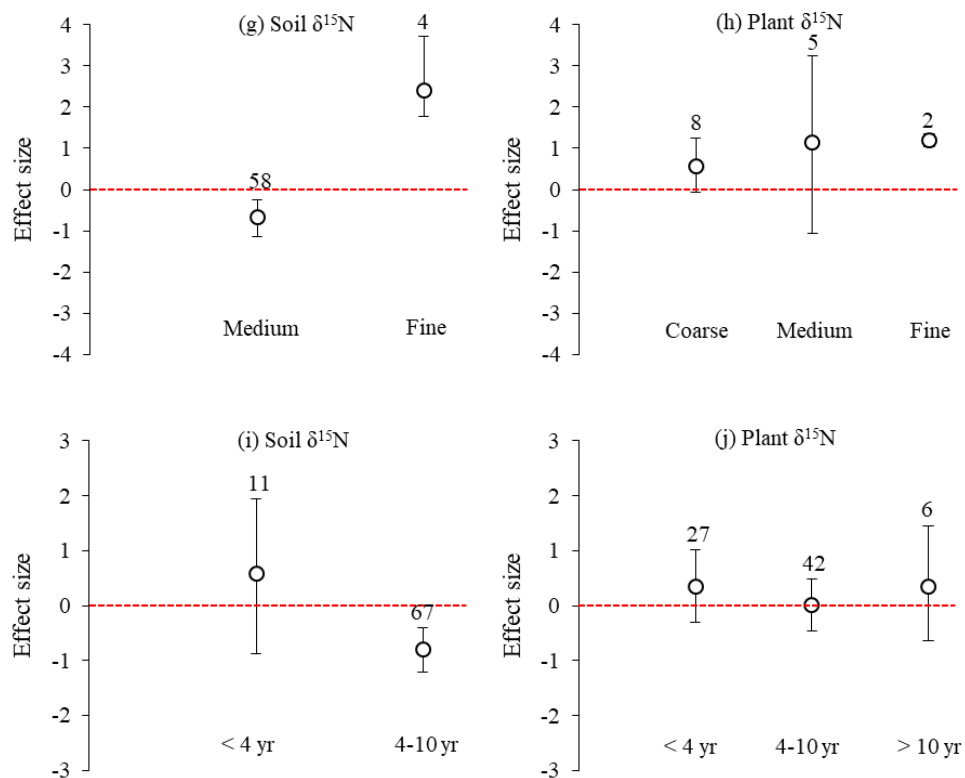

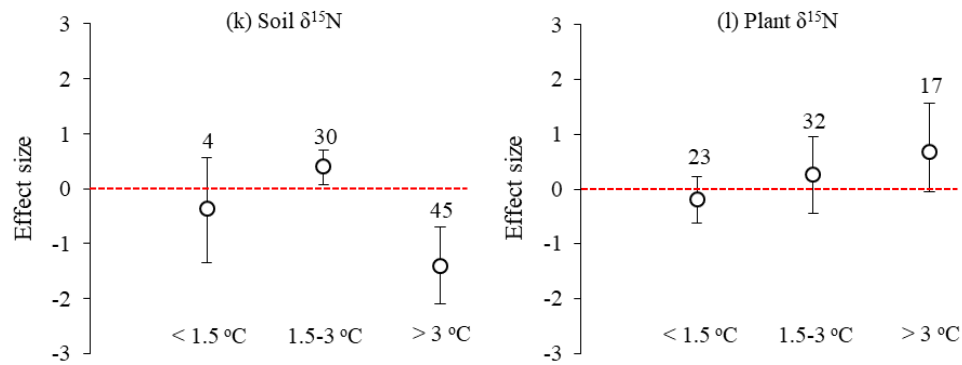

Temperature has been demonstrated to be a key factor to regulate the soil  $\delta^{15}\text{N}$  by influencing the processes of N mineralization, nitrification and denitrification (Craine et al., 2015). The higher temperature can strengthen the activity of soil microbes and thereafter increase the N uptake for plants and soil N loss from ammonia volatilization and gas N emissions, and thereby more  $^{15}\text{N}$ -enriched retains in soils (Wang et al., 2019). Craine et al. (2015) also proposed that warmer sites have soil N that is elevated in  $^{15}\text{N}$ , but has lower C:N. Once C:N is controlled, there is little pattern in  $^{15}\text{N}$  across temperature gradients. In other words, the relationship between soil  $\delta^{15}\text{N}$  and climate is indirect, and mediated through climate effects on soil properties (e.g., the concentrations of organic carbon and clay) (P10L204-211).

5. Line 12: The nitrogen-15 ( $^{15}\text{N}$ )...

Answer: In the revised paper, “The  $^{15}\text{N}$ ” has been replaced by “The nitrogen-15 ( $^{15}\text{N}$ )” (P2L12).

6. Line 14: global warming -> experimental warming

Answer: Sorry for this confusion. In the revised paper, “global warming” has been replaced by “experimental warming” (P2L14).

7. Line 15: for -> of

Answer: In the revised paper, “for” has been replaced by “of” (P2L16).

8. Line 29: ...soil  $\delta^{15}\text{N}$  was more effective than plant  $\delta^{15}\text{N}$  in indicating....

Answer: In the revised manuscript, we have indicated that soil  $\delta^{15}\text{N}$  was more effective than plant  $\delta^{15}\text{N}$  in indicating the openness of global ecosystem N cycling (P2L31-33).

9. Line 40: cycle -> cycling

Answer: In the revised paper, “cycle” has been replaced by “cycling” (P3L43).

10. Line 48: becomes a useful tool -> is often used

Answer: In the revised paper, “becomes a useful tool” has been replaced by “is often used” (P3L54).

11. Line 68: In addition to soil warming, air warming was also conducted.

Answer: Sorry for this confusion. In the revised paper, “soil warming experiment” has been replaced by “soil and air warming experiments” (P4L75).

12. Line 93: more than 50? Please specify

Answer: Sorry for this confusion. In the revised paper, we have specified 54 (P6L101).

13. Line 99: can be obtained -> were provided

Answer: In the revised paper, “can be obtained” has been replaced by “were provided” (P6L107).

14. Line 109: Did you do resampling with bootstrap? What are the resampling times?

Answer: Yes. In the revised manuscript, we have stated that “Resampling tests were incorporated into our meta-analysis using the bootstrap method (999 random replicates)” (P6L116-118).

15. Line 122: Mean effect sizes: This concept was not specified earlier. I think that it is technique, soil type, warming treatment... . Is it so? Please, clarify

Answer: Sorry for this confusion. For 1 iteration, 1 Hedges' *d* value (effect size) can be obtained. In this case, we can obtain 999 Hedges' *d* values from 999 iterations. The mean effect size is the mean value of Hedges' *d* values.

16. Line 154-159: The authors should add more references to support this statement.

Answer: In the revised paper, we have added more references to support this statement, i.e., Sorensen and Michelsen, 2011; Rousk and Michelsen, 2017; Wang et al., 2018 (P9L171-172).

17. Line 160-164: Is that true? There were two kinds of  $^{15}\text{N}$ , three soil acidity-alkalinity types, three vegetation types, and three warming treatments groups. Were there enough number of observations for these groups? For example, for plant  $\delta^{15}\text{N}$ , there were only 9, 3 and 2 observations for acid, neutral and alkali, respectively.

Answer: Although there were only 9, 3 and 2 observations for acid, neutral and alkali, respectively, it will not substantially affect the results of meta-analysis. In previous studies, less than 10 samples can also be used for meta-analysis (Please see below).

(1) Feng, J., Zhu, B., 2019. A global meta-analysis of soil respiration and its components in response to phosphorus addition. *Soil Biology and Biochemistry* 135, 38–47.

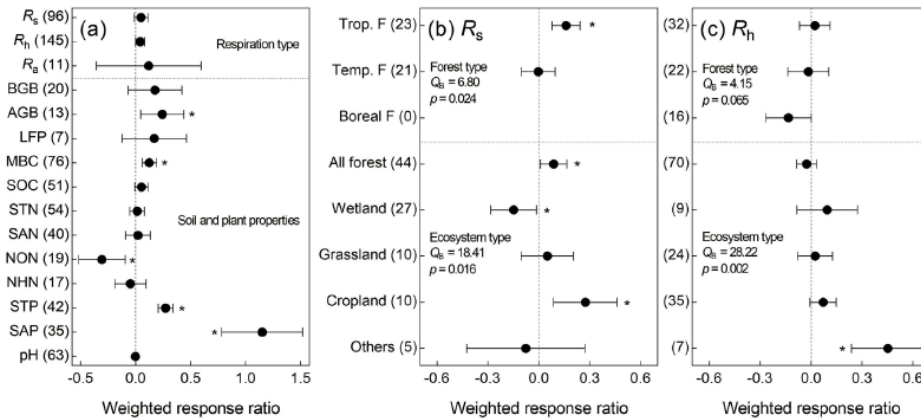

**Fig. 2.** Weighted response ratio of soil respiration ( $R_s$ ), heterotrophic respiration ( $R_h$ ) and autotrophic respiration ( $R_a$ ) in response to phosphorus addition. BGB, AGB, LFP, MBC, SOC, STN, SAN, NON, NHN, STP and SAP represent plant belowground biomass, plant aboveground biomass, litterfall production, microbial biomass carbon, soil organic carbon, soil total nitrogen, soil available nitrogen, soil ammonium nitrogen, soil nitrate nitrogen, soil total phosphorus and soil available phosphorus, respectively. Boreal F, Temp. F and Trop. F represent boreal forest, temperate forest and tropical forest, respectively. Others in soil respiration includes three and two observations from desert and tundra, respectively. Others in heterotrophic respiration included one observation from heath and six observations from unidentified ecosystems according to the descriptions in original case studies. The errors represent 95% confidence intervals (CIs) of weighted response ratio. If 95% CIs did not overlap zero, the P addition effect was considered significant ( $p < 0.05$ , denoted by \*). The numbers in parentheses represent the sample sizes of observations.

(2) Zhang, X.Z., Shen, Z.X., Fu, G., 2015. A meta-analysis of the effects of experimental warming on soil carbon and nitrogen dynamics on the Tibetan Plateau. *Applied Soil Ecology* 87, 32–38.

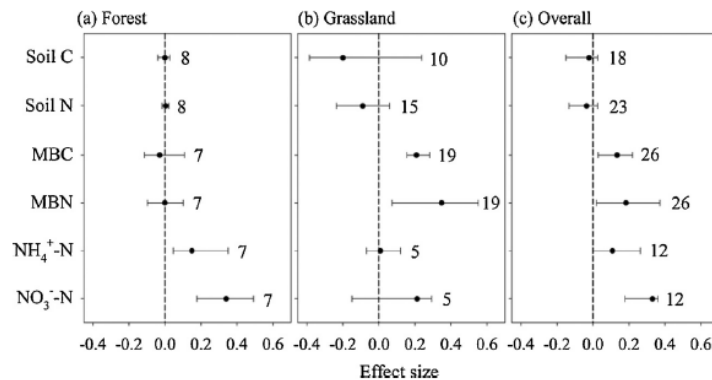

**Fig. 2.** Effect sizes of the experimental warming on soil carbon, soil nitrogen, soil microbial biomass carbon (MBC) and nitrogen (MBN), ammonium nitrogen ( $\text{NH}_4^+\text{-N}$ ) and nitrate nitrogen ( $\text{NO}_3^-\text{-N}$ ) for alpine forests (a), grasslands (b) and forests+grasslands (c) from a meta-analysis of 25 studies on the Tibetan Plateau. The error bars indicate effect sizes and 95% bootstrap confidence intervals. The warming effect was statistically significant if the 95% CI did not bracket zero. The dashed lines are drawn at effect size = 0. The sample size for each variable is shown next to the bar.

(3) Song, X.Z., Peng, C.H., Zhou, G.M., Jiang, H. & Wang, W.F., 2014. Chinese Grain for Green Program led to highly increased soil organic carbon levels: A meta-analysis. *Sci. Rep.* 4, 4460; DOI:10.1038/srep04460.

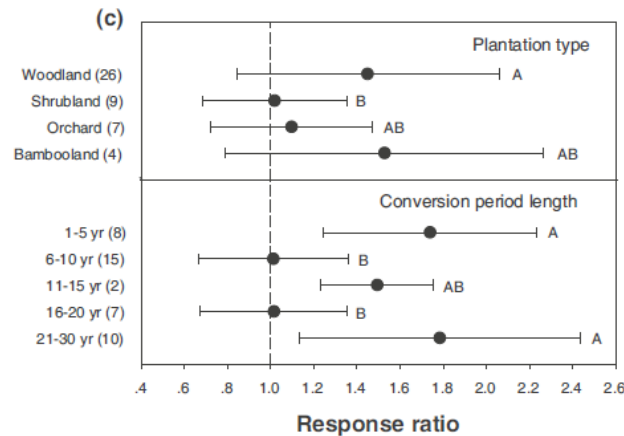

**Figure 3 | Untransformed response ratios pertaining to the effects of the conversion of cropland to forest on soil organic carbon contents at depths of 0–20 cm (a), 20–40 cm (b), and 40–60 cm (c). Dots with error bars denote the overall mean response ratio and 95% CI. Capital letters to the right of the bars indicate statistically significant differences based on the plantation type or conversion period at the  $p < 0.05$  level.**

18. Line 167: add a reference here

Answer: In the revised manuscript, we have added a reference here, i.e., Kyveryga et al., 2004 (P9L180).

19. Line 182-184: awkward sentence

Answer: Sorry for this confusion. In the revised paper, we have rewritten this sentence. In the study of Mayor et al. (2015), who found that soil and plant  $\delta^{15}\text{N}$  were significantly ( $p < 0.001$ ) and negatively correlated with latitude at the global scale. However, the Hedges'  $d$  values of soil and plant  $\delta^{15}\text{N}$  had weak correlations with latitude in this study (Fig. 3) (P10L197-200).

20. Line 185: If you want to use “significantly”, you have to give the P value.

Answer: In the revised paper, we have provided the P value. The warming effect on soil  $\delta^{15}\text{N}$  was significantly ( $p < 0.001$ ) influenced by altitude, MAT and MAP (P10L201).

21. Line 188: Add a reference.

Answer: In the revised manuscript, we have added a reference here, i.e., Craine et al., 2015 (P10L204).



22. Line 211: when investigating -> in order to better investigate

Answer: In the revised paper, “when investigating” has been replaced by “in order to better investigate” (P11L231).
